# Supplementary material for: IQ Motif-Containing G (Iqcg) Is Required for Mouse Spermiogenesis
Source: PubMed Central journal article supplement (PMC3931569; doi:10.1534/g3.113.009563), 2013-12-20
Supplement: supp_g3.113.009563_FigureS1.pdf [file supp_g3.113.009563_FigureS1.pdf]

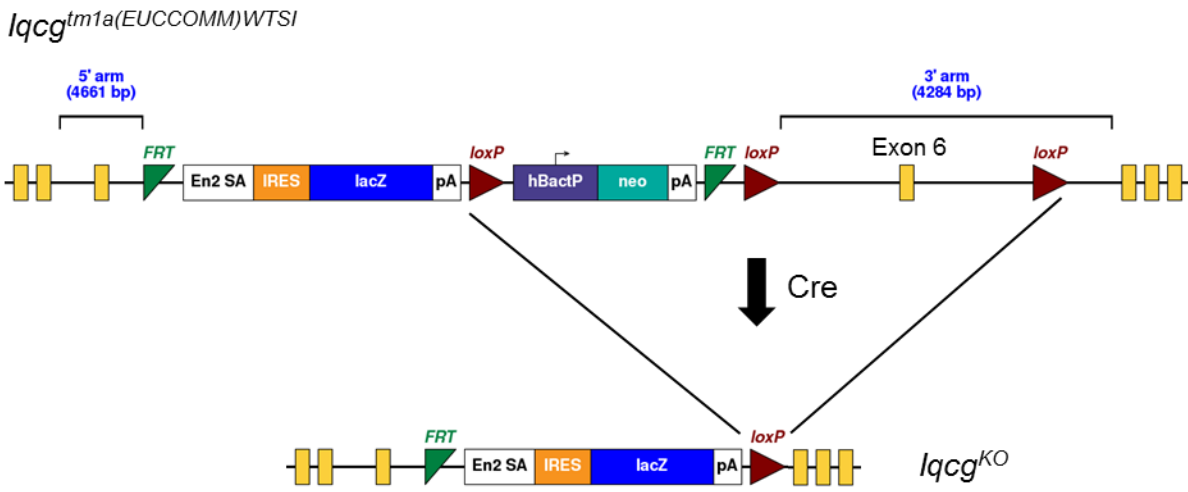

**Figure S1** Structure of *lqcg* null allele. The targeted allele at the top was generated at The Sanger Institute, and this is a screenshot from the KOMP (Knockout mouse project) web site (<http://www.knockoutmouse.org/martsearch/project/36432>). See methods for details.
